# Supplementary material
Source: PubMed Central journal article supplement (PMC5683422)
Supplement: NIHMS905832-supplement.pdf [file NIHMS905832-supplement.pdf]

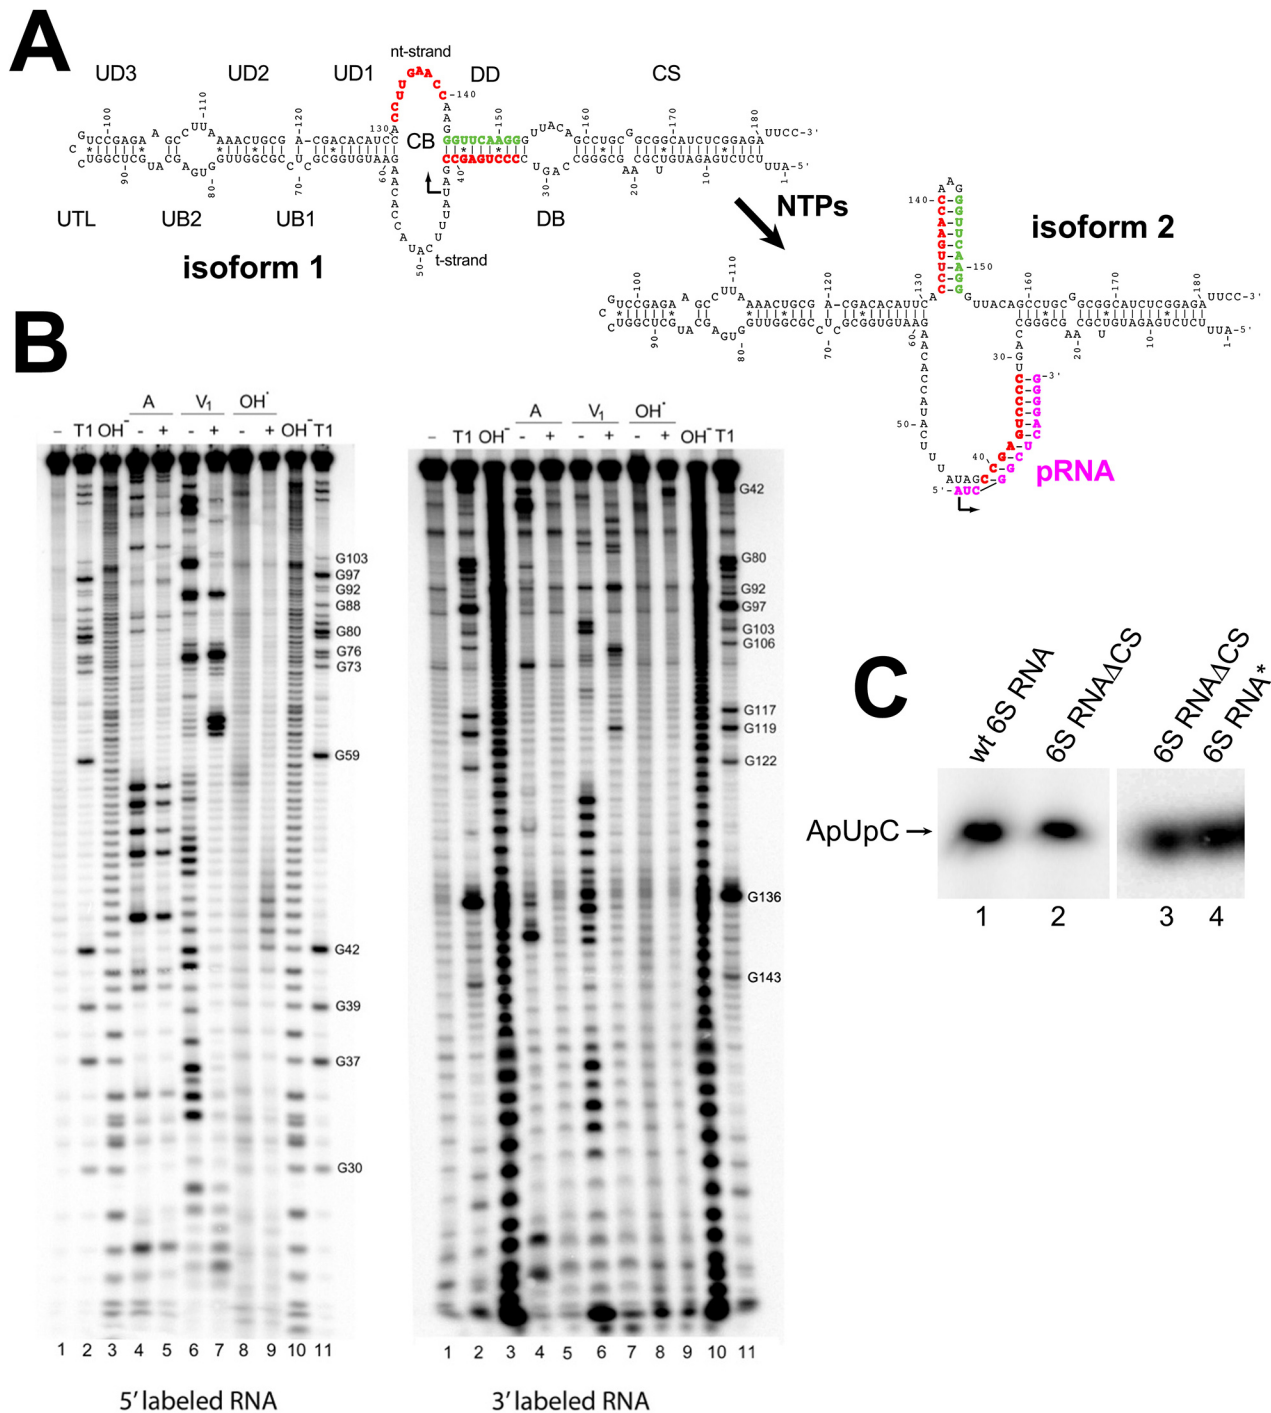

**Figure S1. 6S RNA structural transition and footprinting. Related to Figures 1 and 2.**

(A) The pRNA-induced structural transition of 6S RNA (Beckmann et al., 2012; Panchapakesan and Unrau, 2012). (*top left*) Secondary structure of wild-type 6S RNA isoform 1 (*top left*) and isoform 2 (*bottom right*). Isoform 2 is stabilized by the RNAP-mediated synthesis of pRNA (magenta).

(B) RNase footprinting gels: T1 shows cleavage by RNase T1 specific for G-residues, their positions are indicated on the right side of gels, A and V<sub>1</sub> – cleavage by RNase A (cleaves 3' of U and C residues) and V<sub>1</sub> (cleaves base-paired nucleotides), respectively. OH\* represents hydroxyl radical cleavage, OH<sup>-</sup> - Alkaline Hydrolysis under single hit conditions, resulting in an RNA 'ladder' with single nucleotide resolution.

(*left*) 5'-labeled RNA. '-' and '+' indicates absence or presence of Eσ<sup>70</sup>, respectively.

(*right*) 3'-labeled RNA.

(C) Relative abortive transcription activity of wild-type 6S RNA (lane 1) and 6S RNA with the CS truncated (6S RNA $\Delta$ CS, lane 2), and 6S RNA $\Delta$ CS (lane 3) and 6S RNA\* (lane 4).

**A**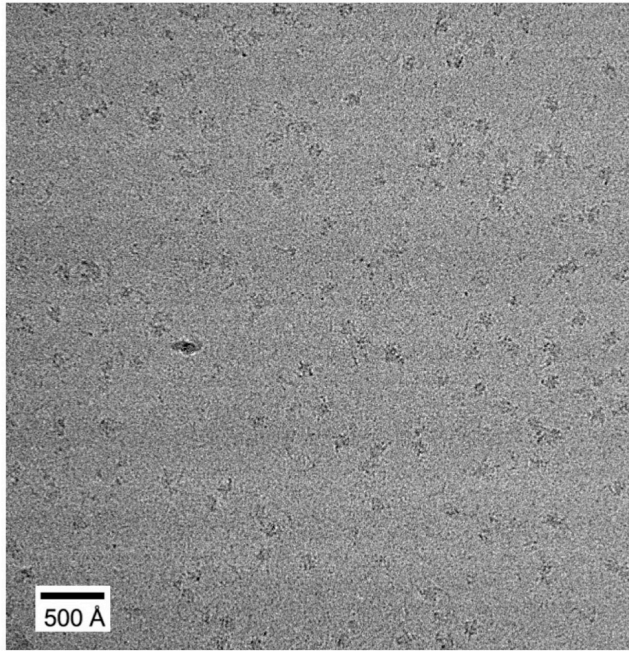**B**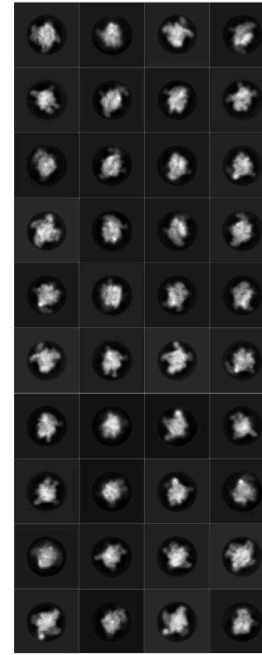**C**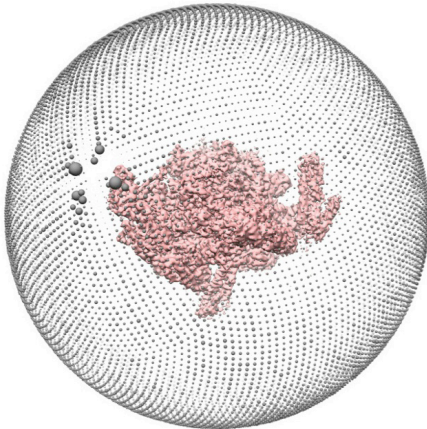**D**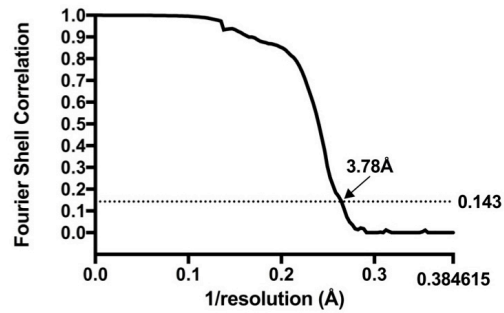**E**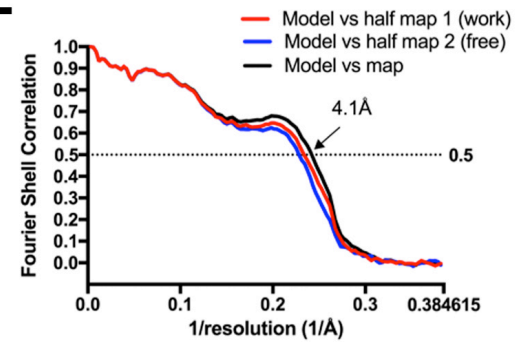

**Figure S2. CryoEM of the 6S RNA/E $\sigma^{70}$  complex. Related to Figure 1.**

(A) Representative micrograph of the 6S RNA/E $\sigma^{70}$  complex in vitreous ice.

(B) The forty highest populated classes from 2D classification.

(C) Angular distribution for 6S RNA/E $\sigma^{70}$  particle projections.

(D) Gold-standard FSC of the 6S RNA/E $\sigma^{70}$  complex. The gold-standard FSC was calculated by comparing the two independently determined half-maps from RELION. The dotted line represents the 0.143 FSC cutoff, which indicates a nominal resolution of 3.78 Å.

(E) FSC calculated between the refined structure and the half map used for refinement (work), the other half map (free), and the full map.

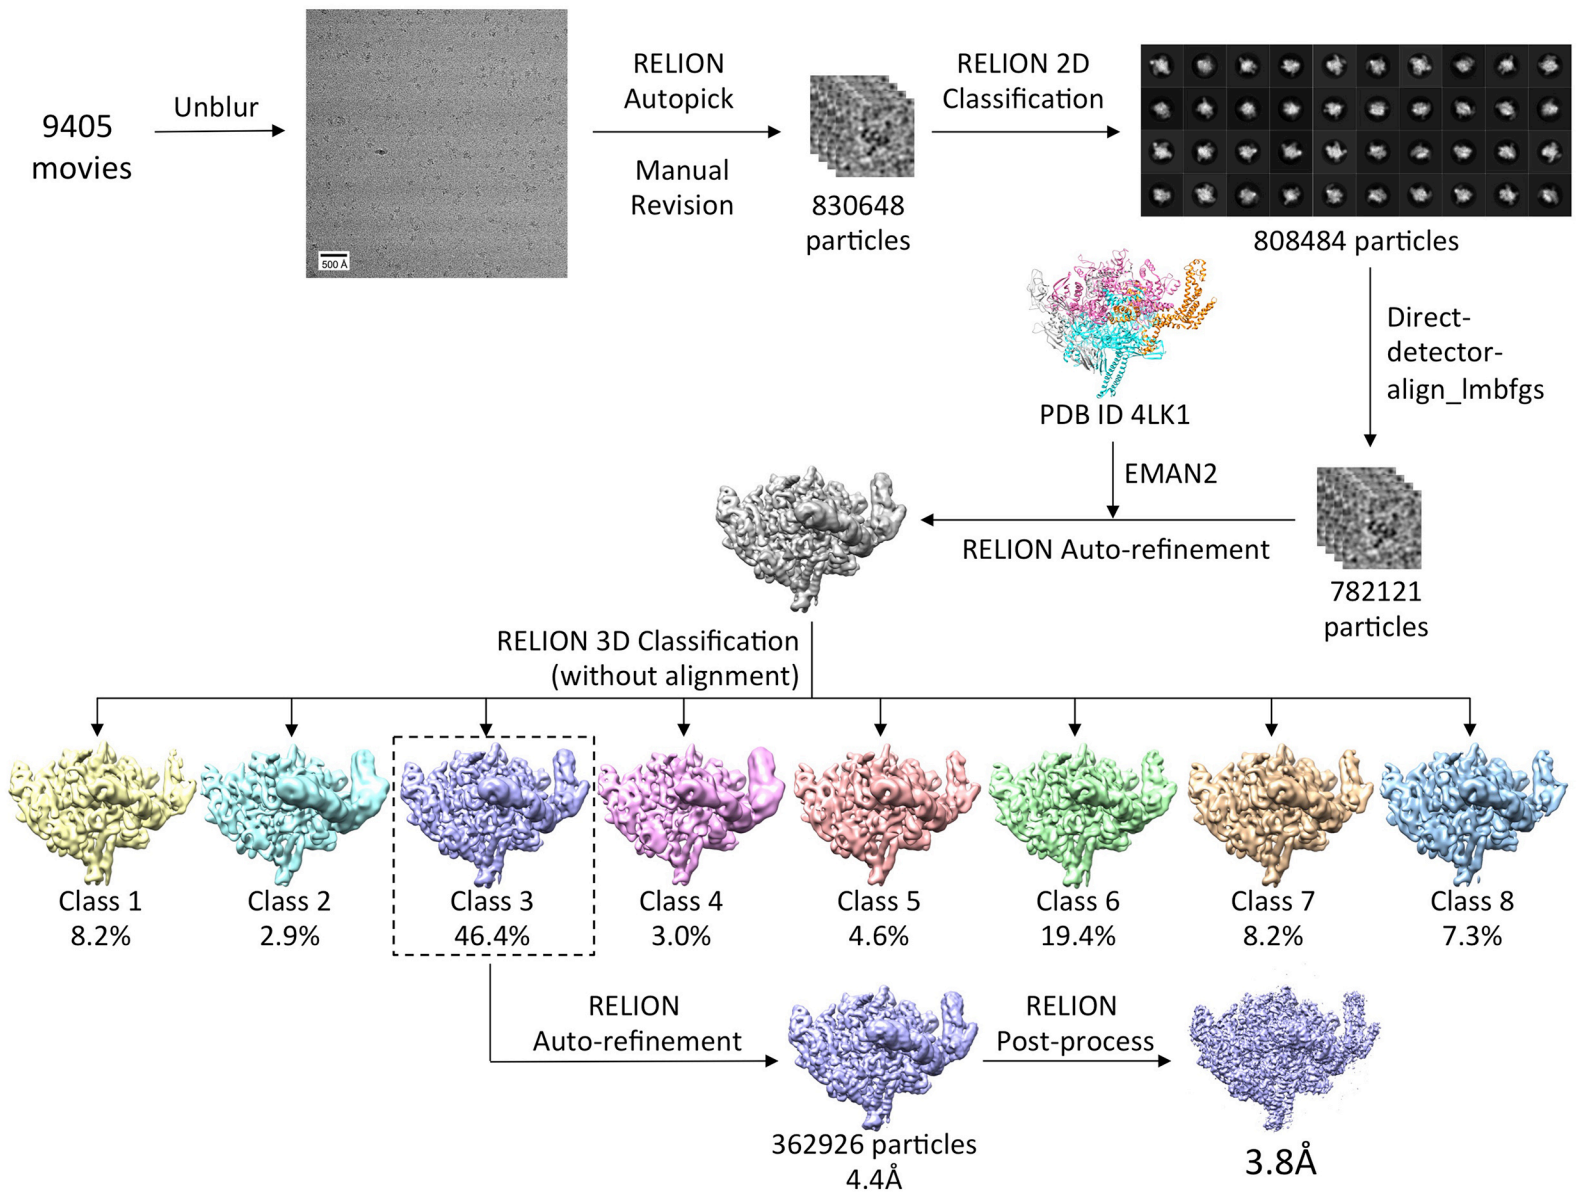

Chen et al., Figure S3

**Figure S3. Data processing pipeline for the cryoEM data. Related to Figure 1.**

Flowchart showing the image processing pipeline for the cryoEM data of

*Eco* 6S RNA\*/ $\Delta\alpha$ CTD-E- $\Delta$ 1.1 $\sigma$ <sup>70</sup> starting with 9,405 dose-fractionated movies collected on a 300 keV Titan Krios (FEI) equipped with a K2 Summit direct electron detector (Gatan). Movie frames were aligned and summed using Unblur (Grant and Grigorieff, 2015). Particles were autopicked and manually revised from these summed images and then sorted by 2D classification in RELION (Scheres, 2012) for subsequent particle polishing using direct-detector-align\_lmbfgs software (Rubinstein and Brubaker, 2015). After polishing, the dataset contained 782,121 aligned particles. These particles were auto-refined in RELION using a model of *Eco* E $\sigma$ <sup>70</sup> (PDB ID 4LK1) (Bae et al., 2013) that was low-pass filtered to 60 Å resolution using EMAN2 (Tang et al., 2007) as an initial 3D template. 3D classification into eight classes was performed on the particles using the refined model and alignment angles. No obvious conformational differences were observed between the 3D classes. Class 3, containing 362,926 particles, was the most populated class with a 3.8 Å resolution after auto-refinement and post-processing in RELION.

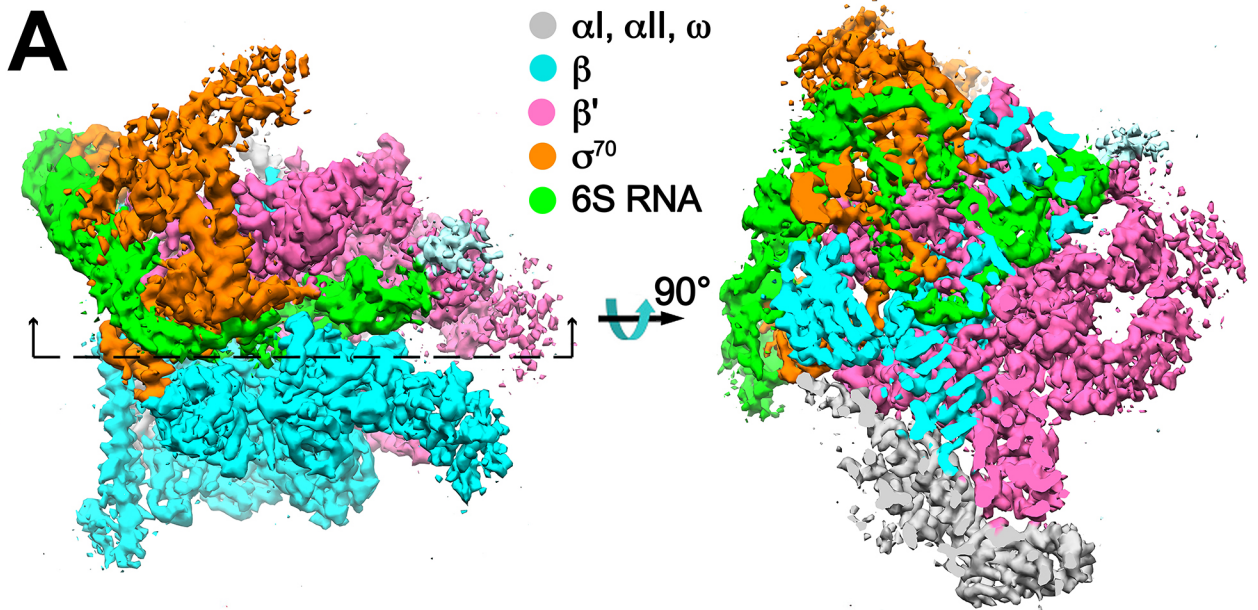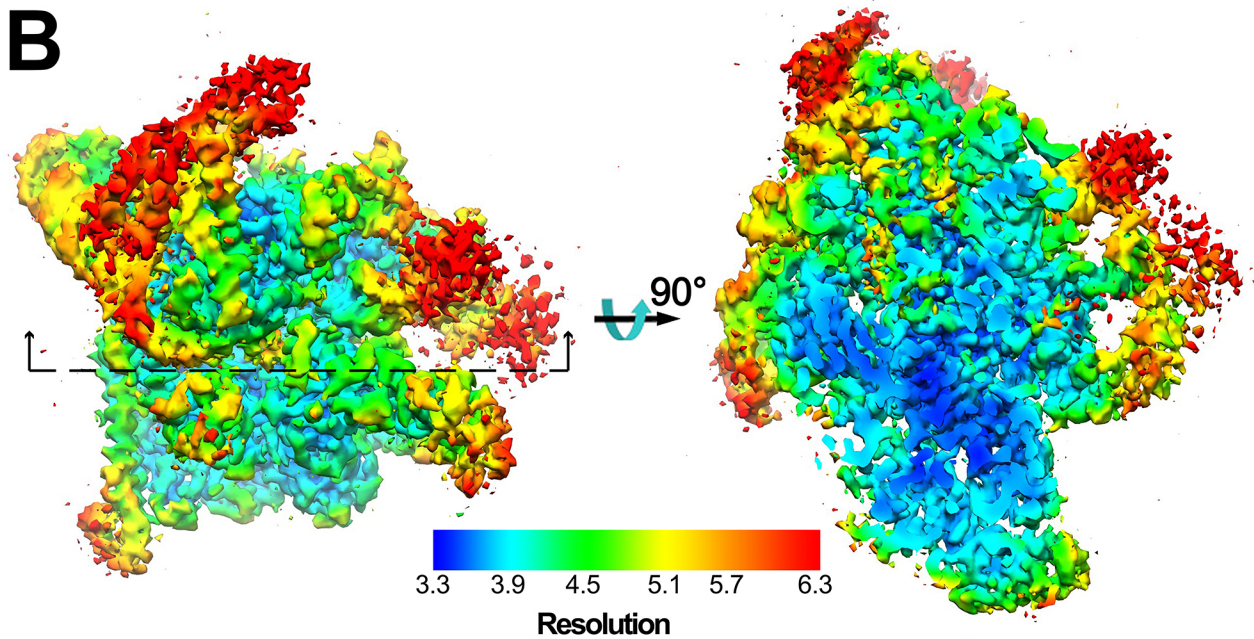

**Figure S4. Overall cryo-EM map and local resolution of 6S RNA/E $\sigma^{70}$ . Related to Figure 1.**

**(A)** The 3.8-Å resolution cryoEM density map of the 6S RNA/E $\sigma^{70}$  complex colored according to the legend at the top. The view on the right shows a cross section at the position indicated in the left panel.

**(B)** Same views of the cryoEM density map as in **A**, but colored by local resolution (Cardone et al., 2013).



**A**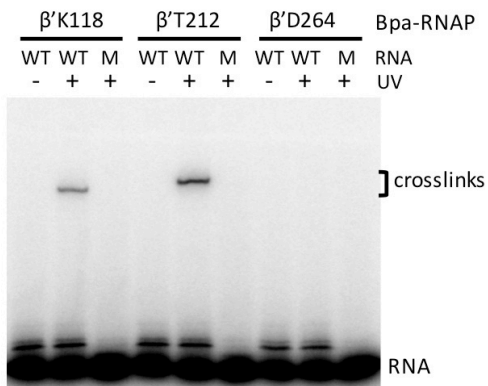**C**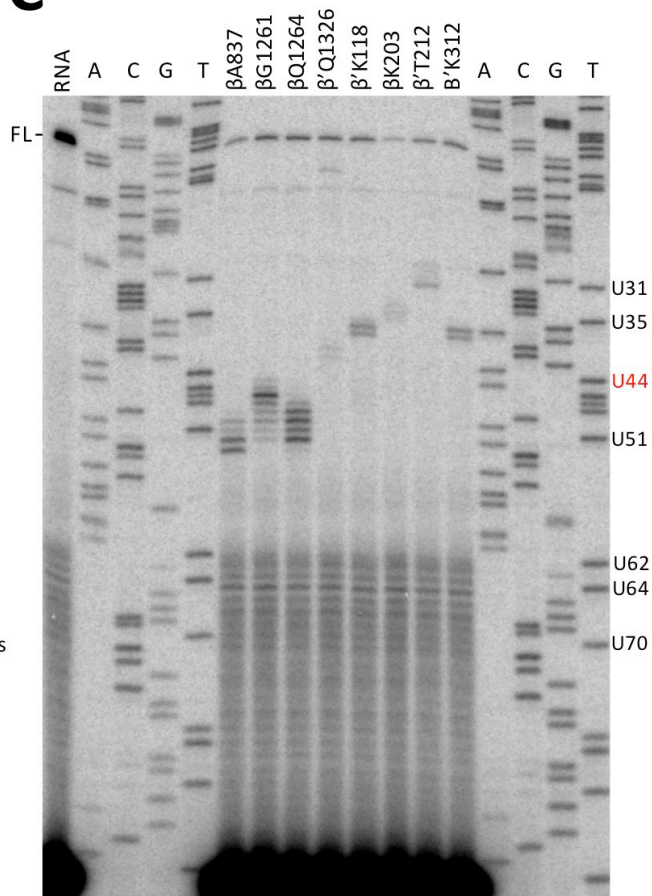**B**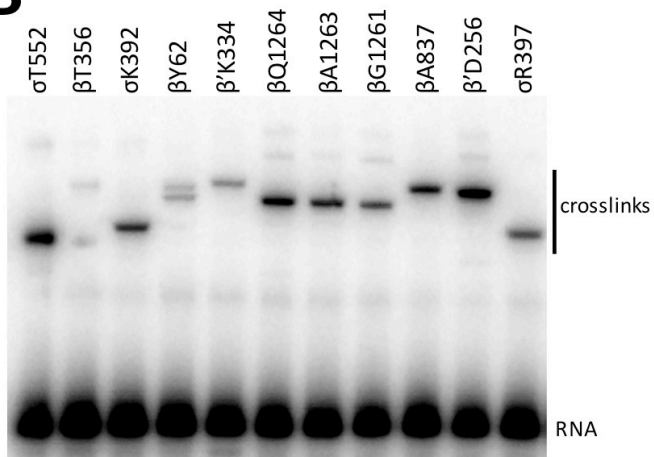**D**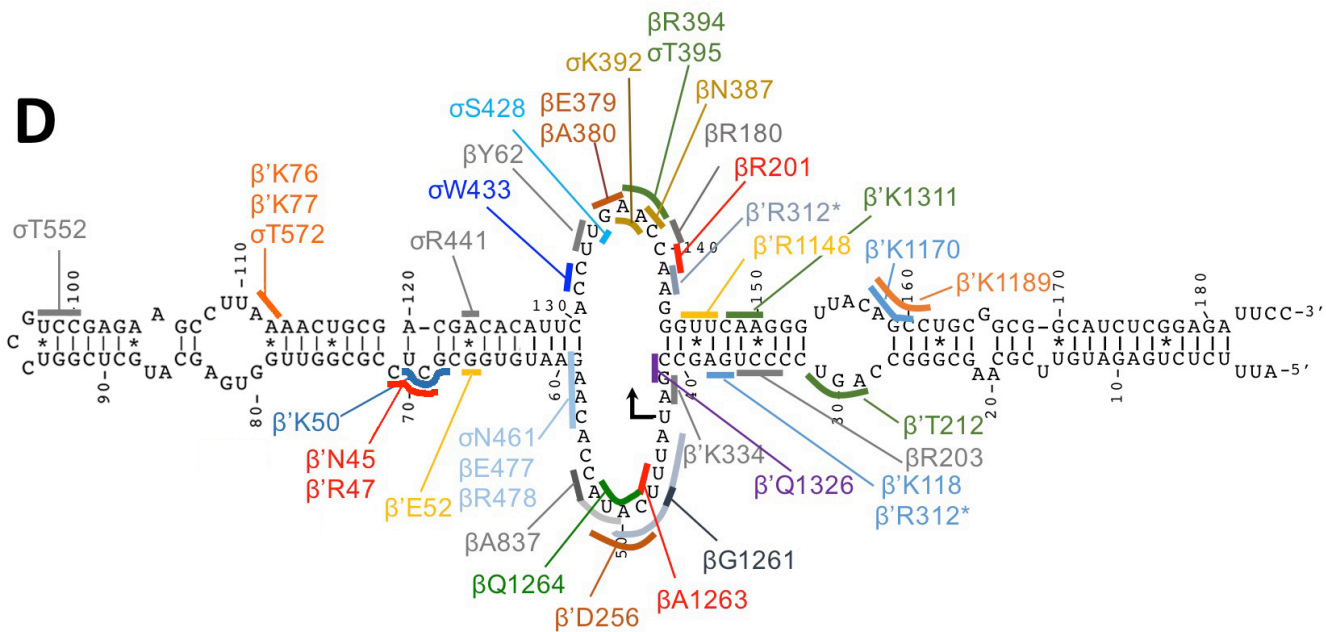

**Figure S5. BPA-dependent crosslinking to 6S RNA and crosslink mapping. Related to Figure 2.**

(A) 6S RNA crosslinking to BPA-substituted RNAP is dependent on UV irradiation and position of BPA substitutions. <sup>32</sup>P-labelled RNA [WT, wild-type 6S RNA; M, 6S(M5) RNA] (2 nM) was incubated with BPA-substituted E $\sigma$ <sup>70</sup> (position of BPA substitutions indicated at top)(~100 nM), exposed to 365-nm light (+UV) or kept in the dark (-UV), and separated on NuPage protein gels. Uncrosslinked RNA is observed near the bottom of the gel (RNA) and crosslinked RNA migrates more slowly in the gel (crosslinked RNA). 6S(M5) RNA is an inactive mutant with a severely reduced central bubble (Trotochaud and Wassarman, 2005). BPA substitutions at  $\beta$ 'K118 and  $\beta$ 'T212 crosslink to 6S RNA in a UV-dependent manner, but not the inactive M5 mutant. BPA substitution at  $\beta$ 'D264 does not crosslink to RNA.

(B) An example of crosslinking results with different BPA-substituted RNAPs on <sup>32</sup>P-labeled 6S RNA.

(C) An example of primer extension mapping of BPA crosslinking positions in 6S RNA. Unlabelled 6S RNA was incubated with BPA-substituted E $\sigma$ <sup>70</sup> (position of BPA substitutions indicated at top)(~100 nM), exposed to 365-nm light, followed by Ni-NTA enrichment of crosslinked RNAs (see Methods). Enriched RNAs were used as template for primer extension reactions using <sup>32</sup>P-labeled KW1469 primer (complementary to nucleotides 88-111 in 6S RNA) and separated on a 10% denaturing polyacrylamide gel run with a salt gradient. Sequencing reactions (A, C, G, T) were generated with the same labeled primer for reference. The first lane (RNA) is primer extension from uncrosslinked RNA for reference.

(D) Mapped BPA-crosslinking positions from BPA-substituted RNAPs are indicated on the secondary structure of 6S RNA. Some positions crosslink to multiple nearby nucleotides, as represented by the lines covering RNA nucleotides.

**A**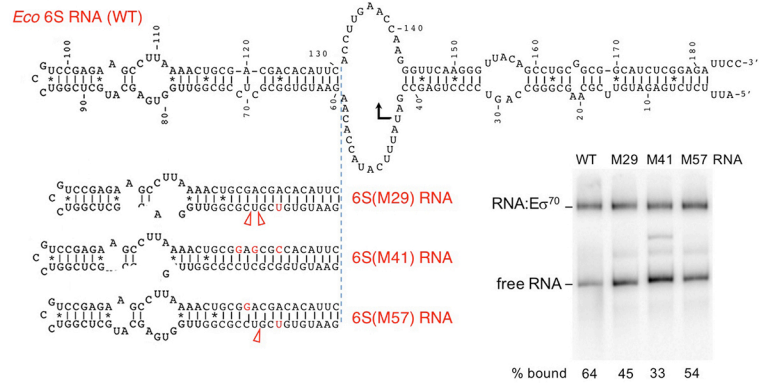**B**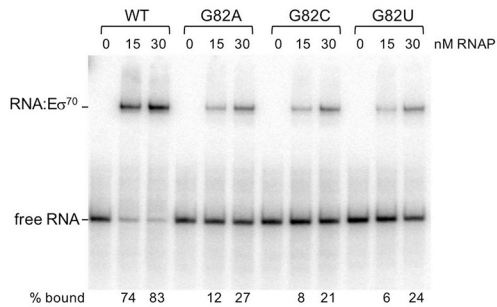**C**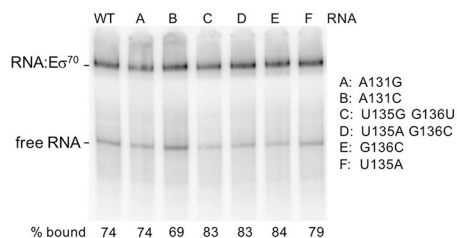**D**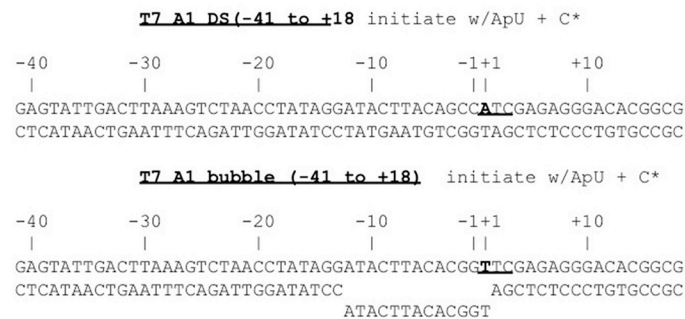**E**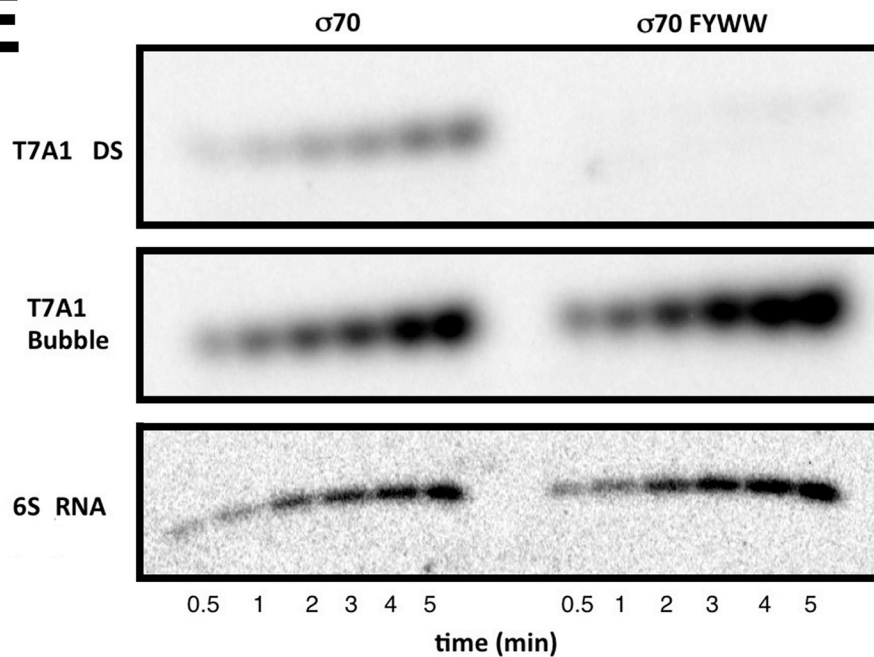

**Figure S6. Effects of 6S RNA modifications on  $E\sigma^{70}$  binding, and 6S RNA is pre-melted and does not require the  $\sigma^{70}$  W-dyad for transcription bubble stabilization.**

**Related to Figures 5 and 6.**

(A) Illustration of the changes made to remove UB1. Different changes were made that all resulted in basepairing through the UB1 region, but with different effects on the length of the upstream stem. Note, residues changed from wild type or inserted are in red; the red triangles indicate the locations of deleted nucleotides. (*lower right*) A native gel electrophoresis binding assay illustrates the decrease in 6S RNA binding when UB1 is absent.

(B, C) Native gel electrophoresis binding assays illustrating the strong effect of 6S RNA G82 substitutions on 6S RNA binding (B), the absence of altered binding for 6S RNA substitutions at A131, U135, or G136 (C).

(D) Sequences of the duplex T7 A1 promoter (*top*) and the T7 A1 bubble promoter (*bottom*).

(E) Abortive transcription activity (ApUpC synthesis) of  $E\sigma^{70}$  (left panel) and melting-deficient  $E\sigma^{70}_{FYWW}$  (Tomsic et al., 2001) on duplex T7 A1 (T7A1 DS, top row), T7 A1 bubble (middle row), and 6S RNA (bottom row).

**A**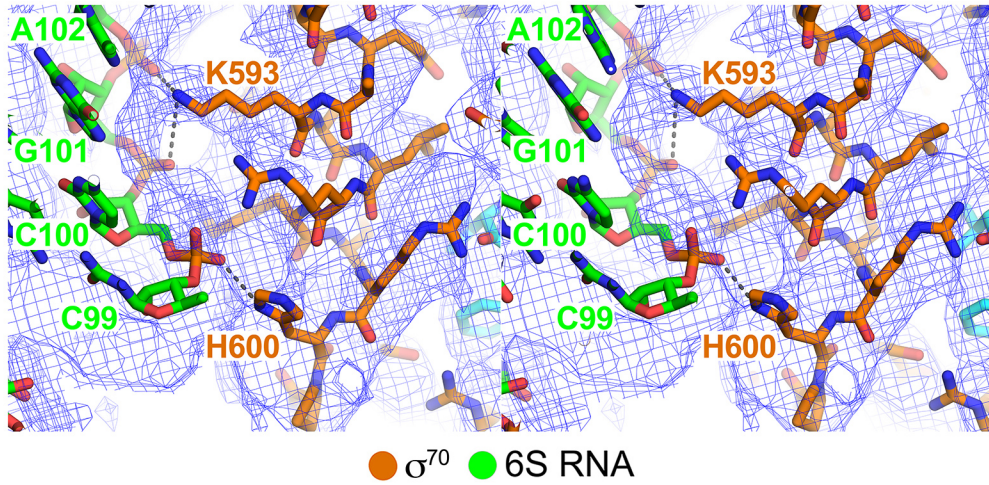**B**

Ratio of Activity Relative to Wildtype

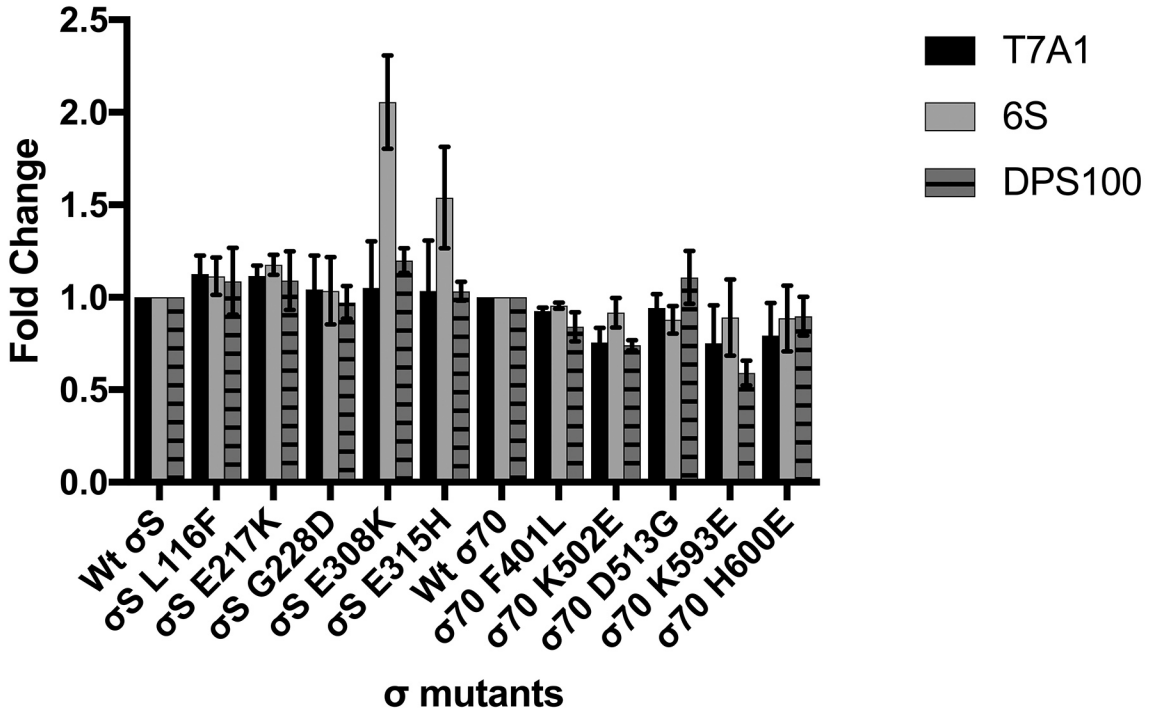

**Figure S7. Interactions between  $\sigma^{70}$  K593 and H600 with 6S RNA, and normalized abortive transcription activity of  $\sigma$  mutants. Related to Figure 7.**

(A) Stereo view of the 6S RNA/ $E\sigma^{70}$  cryoEM density map (blue mesh) showing the interaction of  $\sigma^{70}$  K593 and H600 with the 6S RNA phosphate backbone.

(B) Histogram showing the normalized abortive transcription initiation activity for the indicated  $\sigma$ 's (bottom) on the indicated templates ( $\sigma^{70}$ -specific promoter T7A1;  $\sigma^{70}$ -specific 6S RNA;  $\sigma^S$ -specific promoter DPS (Grainger et al., 2008)). The  $\sigma^S$ -holoenzyme activities are shown normalized with respect to wild-type  $\sigma^S$ , while the  $\sigma^{70}$ -holoenzymes are shown normalized to wild-type  $\sigma^{70}$ . The histograms represent the average of at least three measurements, the error bars denote S.E.M.s.

**Table S1. Model statistics from Molprobity (Chen et al., 2010).  
Related to Figure 1.**

|                                       |                              | 6S RNA/E $\sigma$ <sup>70</sup> |
|---------------------------------------|------------------------------|---------------------------------|
| Overall                               | Resolution <sup>a</sup>      | 3.78 Å                          |
|                                       | Molprobity score             | 1.83                            |
|                                       | Clashscore (all atoms)       | 6.56                            |
|                                       | RMS deviations bonds (Å)     | 0.007                           |
|                                       | RMS deviations angles (°)    | 1.027                           |
|                                       |                              |                                 |
| Protein<br>(3,132 residues)           | Rotamer outliers             | 0.54%                           |
|                                       | Ramachandran favored         | 92.57%                          |
|                                       | Ramachandran outliers        | 0.08%                           |
|                                       |                              |                                 |
| RNA <sup>b</sup><br>(112 nucleotides) | Probably wrong sugar puckers | 0                               |
|                                       | Bad backbone conformations   | 3 (2.68%)                       |

<sup>a</sup> Gold-standard FSC 0.143 cutoff criteria (Figure S2D) (Rosenthal and Henderson, 2003).

<sup>b</sup> ref. (Richardson et al., 2008)



**Table S2. Minor and major groove widths and axial base pair rise for 6S RNA<sup>a</sup>. Related to Figure 4.**

| 6S RNA element <sup>b</sup> | Strand I | step  | Strand II | Minor groove P-P (Å) <sup>c</sup>          | Major groove P-P (Å) <sup>c</sup>          | Rise (Å)         | Twist (°) | Pitch (Å) |
|-----------------------------|----------|-------|-----------|--------------------------------------------|--------------------------------------------|------------------|-----------|-----------|
| DD*                         | 32-33    | CG/CG | 152-153   |                                            |                                            | 3.6              | 28        | 41        |
|                             | 33-34    | GG/CC | 151-152   |                                            |                                            | 2.9              | 32        |           |
|                             | 34-35    | GC/AC | 150-151   | 11.5                                       | 10.4                                       | 2.8              | 33        |           |
|                             | 35-36    | CA/UA | 149-150   | 11.2                                       | 11.9                                       | 4.4              | 29        |           |
|                             | 36-37    | AC/GU | 148-149   | 10.7                                       | 13.2                                       | 3.2              | 31        |           |
|                             | 37-38    | CA/UG | 147-148   | 10.5                                       | 15.2                                       | 3.4              | 24        |           |
|                             | 38-39    | AU/GU | 146-147   | 10.6                                       | 13.8                                       | 3.1              | 39        |           |
|                             | 39-40    | UG/CG | 145-146   |                                            |                                            | 3.7              | 18        |           |
|                             | 40-41    | GC/GC | 144-145   |                                            |                                            | 3.3              | 31        |           |
| UD1                         | 59-60    | GA/UC | 129-130   |                                            |                                            | 2.9              | 32        | 35        |
|                             | 60-61    | AA/UU | 128-129   | 10.9                                       | 14.9                                       | 3.2              | 30        |           |
|                             | 61-62    | AU/AU | 127-128   | 10.7                                       | 12.9                                       | 3.2              | 28        |           |
|                             | 62-63    | UG/CA | 126-127   | 10.7                                       | 12.7                                       | 3.4              | 27        |           |
|                             | 63-64    | GU/AC | 125-126   | 10.8                                       | 12                                         | 3.2              | 32        |           |
|                             | 64-65    | UG/CA | 124-125   | 10.9                                       | 11.1                                       | 3.2              | 31        |           |
|                             | 65-66    | GG/AC | 123-124   | 10.6                                       | 10.6                                       | 3.1              | 30        |           |
|                             | 66-67    | GC/GA | 122-123   | 9.3                                        | 9.9                                        | 3.2              | 31        |           |
|                             | 67-68    | CG/CG | 121-122   | 9.9                                        | 8.8                                        | 2.9              | 33        |           |
| UD2                         | 72-73    | CG/CG | 118-119   | 10.8                                       | 9.2                                        | 4.4              | 30        | 33        |
|                             | 73-74    | GC/GC | 117-118   | 10.7                                       | 11.2                                       | 3.1              | 35        |           |
|                             | 74-75    | CG/UG | 116-117   | 11.0                                       | 12.1                                       | 3.3              | 26        |           |
|                             | 75-76    | GG/CU | 115-116   | 11.5                                       | 11                                         | 2.9              | 33        |           |
|                             | 76-77    | GU/AC | 114-115   | 11.8                                       | 10.3                                       | 3.1              | 32        |           |
|                             | 77-78    | UU/AA | 113-114   |                                            |                                            | 3.1              | 29        |           |
|                             | 78-79    | UG/AA | 112-113   |                                            |                                            | 1.4              | 49        |           |
| UD3                         | 88-89    | GC/GA | 103-104   | 13.3                                       | 15                                         | 3.2              | 39        | 31        |
|                             | 89-90    | CU/AG | 102-103   | 12.1                                       | 10.8                                       | 3.0              | 25        |           |
|                             | 90-91    | UC/GA | 101-102   | 12.1                                       | 11.5                                       | 2.9              | 30        |           |
|                             | 91-92    | CG/CG | 100-101   | 11.9                                       | 10.9                                       | 2.6              | 34        |           |
|                             | 92-93    | GG/CC | 99-100    |                                            |                                            | 3.0              | 37        |           |
|                             | 93-94    | GU/UC | 98-99     |                                            |                                            | 2.9              | 39        |           |
|                             |          |       |           |                                            |                                            |                  |           |           |
|                             |          |       |           | Canonical A-form nucleic acid <sup>d</sup> | Canonical B-form nucleic acid <sup>d</sup> | 6S RNA (average) |           |           |
|                             |          |       | Rise (Å)  | 2.6                                        | 3.4                                        | 3.2 ± 0.5        |           |           |
|                             |          |       | Twist (°) | 33                                         | 36                                         | 32 ± 6           |           |           |
|                             |          |       | Pitch (Å) | 28                                         | 34                                         | 35 ± 4           |           |           |

<sup>a</sup>Parameters calculated using 3DNA (Lu and Olson, 2008).

<sup>b</sup>See Figure 1A.

<sup>c</sup>Direct P-P distances (with van der Waals radii of phosphate groups, 5.8 Å, subtracted).

<sup>d</sup>ref. (Egli and Saenger, 2013).

**Table S3. Sugar puckers for 6S RNA<sup>a</sup>. Related to Figure 4.**

| 6S RNA element | Strand I   |              | Strand II  |              |
|----------------|------------|--------------|------------|--------------|
|                | nucleotide | Sugar pucker | nucleotide | Sugar pucker |
| DD*            | 32C        | C3'-endo     | 153G       | C3'-endo     |
|                | 33G        | C3'-endo     | 152C       | C3'-endo     |
|                | 34G        | C3'-endo     | 151C       | C3'-endo     |
|                | 35C        | C3'-endo     | 150A       | C3'-endo     |
|                | 36A        | C3'-endo     | 149U       | C3'-endo     |
|                | 37C        | C3'-endo     | 148G       | C3'-endo     |
|                | 38A        | C3'-endo     | 147U       | C3'-endo     |
|                | 39U        | C3'-endo     | 146G       | C3'-endo     |
|                | 40G        | C3'-endo     | 145C       | C3'-endo     |
|                | 41C        | C3'-endo     | 144G       | C3'-endo     |
| UD1            | 59G        | C3'-endo     | 130C       | C3'-endo     |
|                | 60A        | C3'-endo     | 129U       | C3'-endo     |
|                | 61A        | C3'-endo     | 128U       | C3'-endo     |
|                | 62U        | C3'-endo     | 127A       | C3'-endo     |
|                | 63G        | C3'-endo     | 126C       | C3'-endo     |
|                | 64U        | C3'-endo     | 125A       | C3'-endo     |
|                | 65G        | C3'-endo     | 124C       | C3'-endo     |
|                | 66G        | C3'-endo     | 123A       | C3'-endo     |
|                | 67C        | C3'-endo     | 122G       | C3'-endo     |
|                | 68G        | C3'-endo     | 121C       | C3'-endo     |
| UD2            | 72C        | C3'-endo     | 118G       | C3'-endo     |
|                | 73G        | C1'-endo     | 117C       | C3'-endo     |
|                | 74C        | C3'-endo     | 116G       | C3'-endo     |
|                | 75G        | C3'-endo     | 115U       | C3'-endo     |
|                | 76G        | C3'-endo     | 114C       | C3'-endo     |
|                | 77U        | C3'-endo     | 113A       | C3'-endo     |
|                | 78U        | C3'-endo     | 112A       | C3'-endo     |
|                | 79G        | C3'-endo     | 111A       | C2'-endo     |
| UD3            | 88G        | C3'-endo     | 104A       | C3'-endo     |
|                | 89C        | C3'-endo     | 103G       | C3'-endo     |
|                | 90U        | C3'-endo     | 102A       | C3'-endo     |
|                | 91C        | C3'-endo     | 101G       | C3'-endo     |
|                | 92G        | C3'-endo     | 100C       | C2'-exo      |
|                | 93G        | C3'-endo     | 99C        | C3'-endo     |
|                | 94U        | C3'-endo     | 98U        | C3'-endo     |

<sup>a</sup>Calculated using 3DNA (Lu and Olson, 2008).

**Table S4. Intrastrand P—P virtual bond distances<sup>a</sup>. Related to Figure 4.**

| 6S RNA element <sup>b</sup>               | Strand I | step | Intrastrand P—P distance (Å)               |  | Strand II                                  | step             | Intrastrand P—P distance (Å) |
|-------------------------------------------|----------|------|--------------------------------------------|--|--------------------------------------------|------------------|------------------------------|
| DD*                                       | 32-33    | CG   | 6.0                                        |  | 152-153                                    | CG               | 5.8                          |
|                                           | 33-34    | GG   | 6.5                                        |  | 151-152                                    | CC               | 5.8                          |
|                                           | 34-35    | GC   | 5.7                                        |  | 150-151                                    | AC               | 5.9                          |
|                                           | 35-36    | CA   | 5.6                                        |  | 149-150                                    | UA               | 5.9                          |
|                                           | 36-37    | AC   | 5.7                                        |  | 148-149                                    | GU               | 6.4                          |
|                                           | 37-38    | CA   | 6.0                                        |  | 147-148                                    | UG               | 5.6                          |
|                                           | 38-39    | AU   | 5.9                                        |  | 146-147                                    | GU               | 6.6                          |
|                                           | 39-40    | UG   | 5.8                                        |  | 145-146                                    | CG               | 5.8                          |
|                                           | 40-41    | GC   | 5.6                                        |  | 144-145                                    | GC               | 5.4                          |
| UD1                                       | 59-60    | GA   | 6.3                                        |  | 129-130                                    | UC               | 5.6                          |
|                                           | 60-61    | AA   | 7.0                                        |  | 128-129                                    | UU               | 6.0                          |
|                                           | 61-62    | AU   | 5.5                                        |  | 127-128                                    | AU               | 5.8                          |
|                                           | 62-63    | UG   | 5.9                                        |  | 126-127                                    | CA               | 5.8                          |
|                                           | 63-64    | GU   | 5.6                                        |  | 125-126                                    | AC               | 5.7                          |
|                                           | 64-65    | UG   | 5.9                                        |  | 124-125                                    | CA               | 5.8                          |
|                                           | 65-66    | GG   | 5.8                                        |  | 123-124                                    | AC               | 6.3                          |
|                                           | 66-67    | GC   | 5.3                                        |  | 122-123                                    | GA               | 5.7                          |
|                                           | 67-68    | CG   | 6.5                                        |  | 121-122                                    | CG               | 6.2                          |
| UD2                                       | 72-73    | CG   | 5.7                                        |  | 118-119                                    | CG               | 5.7                          |
|                                           | 73-74    | GC   | 6.8                                        |  | 117-118                                    | GC               | 6.6                          |
|                                           | 74-75    | CG   | 5.8                                        |  | 116-117                                    | UG               | 6.1                          |
|                                           | 75-76    | GG   | 5.7                                        |  | 115-116                                    | CU               | 5.6                          |
|                                           | 76-77    | GU   | 6.0                                        |  | 114-115                                    | AC               | 5.8                          |
|                                           | 77-78    | UU   | 5.6                                        |  | 113-114                                    | AA               | 4.9                          |
|                                           | 78-79    | UG   | 6.2                                        |  | 112-113                                    | AA               | 8.5                          |
| UD3                                       | 88-89    | GC   | 5.1                                        |  | 103-104                                    | GA               | 6.4                          |
|                                           | 89-90    | CU   | 5.2                                        |  | 102-103                                    | AG               | 6.2                          |
|                                           | 90-91    | UC   | 5.3                                        |  | 101-102                                    | GA               | 5.7                          |
|                                           | 91-92    | CG   | 5.8                                        |  | 100-101                                    | CG               | 6.4                          |
|                                           | 92-93    | GG   | 5.8                                        |  | 99-100                                     | CC               | 7.0                          |
|                                           | 93-94    | GU   | 5.3                                        |  | 98-99                                      | UC               | 6.8                          |
|                                           |          |      | Canonical A-form nucleic acid <sup>d</sup> |  | Canonical B-form nucleic acid <sup>d</sup> | 6S RNA (average) |                              |
| Intrastrand P—P distance (Å) <sup>c</sup> |          |      | 5.9                                        |  | 7.0                                        | 6.0 ± 0.8        |                              |

<sup>a</sup>Parameters calculated using 3DNA (Lu and Olson, 2008).

<sup>b</sup>See Figure 1A.

<sup>c</sup> ref. (Egli and Saenger, 2013).
